# Supplementary material for: Relative Validity of MijnEetmeter: A Food Diary App for Self-Monitoring of Dietary Intake
Source: PubMed Central journal article supplement (PMC8066644; doi:10.3390/nu13041135), 2021-03-30
Supplement: nutrients-13-01135-s001.pdf [file nutrients-13-01135-s001.pdf]

**Table S1.** Median consumption of food groups (g/day) as assessed with 3-day MijnEetmeter and with three 24-h dietary recalls and their correlation, in persons with and without prior experience with MijnEetmeter in the Eetmeter Study.

| Food Group             | Experienced Users ( <i>n</i> = 47) |                      |                   |                                  | Inexperienced Users ( <i>n</i> = 53) |                      |                   |                                  |
|------------------------|------------------------------------|----------------------|-------------------|----------------------------------|--------------------------------------|----------------------|-------------------|----------------------------------|
|                        | MijnEetmeter                       | 24-h Dietary Recalls | <i>p</i> -Value * | Spearman Correlation Coefficient | MijnEetmeter                         | 24-h Dietary Recalls | <i>p</i> -Value * | Spearman Correlation Coefficient |
| Vegetables             | 217                                | 205                  | 0.78              | 0.69                             | 103                                  | 165                  | 0.06              | 0.57                             |
| Fruit                  | 193                                | 204                  | 0.88              | 0.83                             | 128                                  | 150                  | 0.43              | 0.76                             |
| Added fats             | 10                                 | 13                   | 0.17              | 0.76                             | 7                                    | 20                   | <0.001            | 0.24                             |
| Fish                   | 0                                  | 0                    | 0.37              | 0.47                             | 0                                    | 0                    | 0.67              | 0.57                             |
| Legumes                | 0                                  | 0                    | 0.78              | 0.30                             | 0                                    | 0                    | 0.75              | 0.26                             |
| Meat                   | 63                                 | 71                   | 0.90              | 0.72                             | 65                                   | 79                   | 0.05              | 0.56                             |
| Egg                    | 17                                 | 15                   | 0.65              | 0.58                             | 1                                    | 8                    | 0.61              | 0.51                             |
| Nuts                   | 13                                 | 12                   | 0.83              | 0.70                             | 7                                    | 5                    | 0.82              | 0.58                             |
| Milk and milk products | 259                                | 261                  | 0.66              | 0.81                             | 200                                  | 223                  | 0.59              | 0.78                             |
| Cheese                 | 22                                 | 31                   | 0.16              | 0.63                             | 20                                   | 32                   | 0.18              | 0.59                             |
| Bread                  | 106                                | 113                  | 0.67              | 0.47                             | 108                                  | 122                  | 0.10              | 0.62                             |
| Cereal products        | 30                                 | 50                   | 0.19              | 0.46                             | 18                                   | 43                   | <0.001            | 0.20                             |
| Potatoes               | 33                                 | 53                   | 0.05              | 0.16                             | 47                                   | 70                   | 0.21              | 0.52                             |
| Drinks                 | 1583                               | 1700                 | 0.09              | 0.67                             | 1142                                 | 1642                 | <0.001            | 0.62                             |
| Sandwich spread        | 8                                  | 10                   | 0.62              | 0.65                             | 8                                    | 10                   | 0.88              | 0.71                             |
| Soups                  | 1                                  | 2                    | 0.90              | 0.43                             | 0                                    | 0                    | 0.78              | 0.49                             |
| Snacks                 | 33                                 | 36                   | 0.64              | 0.85                             | 60                                   | 71                   | 0.38              | 0.52                             |
| Sauces                 | 9                                  | 8                    | 0.85              | 0.37                             | 8                                    | 14                   | 0.16              | 0.29                             |
| Ready-made meals       | 0                                  | 0                    | <0.001            | 0.04                             | 67                                   | 0                    | <0.001            | 0.18                             |

\* Wilcoxon sign rank test, normal approximation.

**Table S2.** The 50th, 25th and 75th percentile of consumption of food groups (g/day) as assessed with MijnEetmeter and with 24-h dietary recalls and their correlation in MijnEetmeter Study, by gender ( $n = 100$ ).

| Food Group             | <i>n</i> | MijnEetmeter |     |      | 24hr Dietary Recalls |      |      | Wilcoxon*<br><i>p</i> -Value* | Spearman Correlation Coefficients |          |
|------------------------|----------|--------------|-----|------|----------------------|------|------|-------------------------------|-----------------------------------|----------|
|                        |          | P50          | P25 | P75  | P50                  | P25  | P75  |                               | 3-Day Means                       | Same Day |
| Males                  |          |              |     |      |                      |      |      |                               |                                   |          |
| Vegetables             | 35       | 117          | 63  | 222  | 153                  | 104  | 218  | 0.36                          | 0.57                              | 0.62     |
| Fruit                  | 35       | 183          | 88  | 278  | 210                  | 113  | 256  | 0.75                          | 0.77                              | 0.93     |
| Added fats             | 35       | 7            | 0   | 15   | 20                   | 11   | 37   | 0.00                          | 0.49                              | 0.28     |
| Fish                   | 35       | 0            | 0   | 33   | 0                    | 0    | 33   | 0.60                          | 0.49                              | 0.91     |
| Legumes                | 35       | 0            | 0   | 0    | 0                    | 0    | 0    | 0.92                          | 0.39                              | 0.47     |
| Meat                   | 35       | 90           | 67  | 118  | 108                  | 58   | 143  | 0.41                          | 0.41                              | 0.67     |
| Eggs                   | 35       | 0            | 0   | 17   | 4                    | 0    | 33   | 0.48                          | 0.45                              | 0.83     |
| Nuts                   | 35       | 18           | 0   | 27   | 15                   | 0    | 30   | 0.95                          | 0.56                              | 0.81     |
| Milk and milk products | 35       | 223          | 120 | 342  | 245                  | 143  | 392  | 0.51                          | 0.77                              | 0.89     |
| Cheese                 | 35       | 20           | 10  | 38   | 32                   | 12   | 47   | 0.12                          | 0.43                              | 0.78     |
| Bread                  | 35       | 135          | 92  | 175  | 167                  | 96   | 208  | 0.24                          | 0.48                              | 0.89     |
| Cereal products        | 35       | 50           | 0   | 100  | 88                   | 33   | 129  | 0.14                          | 0.25                              | 0.83     |
| Potatoes               | 35       | 33           | 7   | 67   | 47                   | 10   | 103  | 0.29                          | 0.21                              | 0.68     |
| Drinks                 | 35       | 1417         | 967 | 1700 | 1638                 | 1146 | 2047 | 0.10                          | 0.83                              | 0.80     |
| Sandwich spreads       | 35       | 7            | 0   | 20   | 13                   | 3    | 20   | 0.47                          | 0.69                              | 0.88     |
| Soups                  | 35       | 0            | 0   | 83   | 0                    | 0    | 69   | 0.36                          | 0.30                              | 0.77     |
| Snacks                 | 35       | 63           | 35  | 95   | 81                   | 41   | 119  | 0.29                          | 0.51                              | 0.68     |
| Sauces                 | 35       | 9            | 0   | 26   | 13                   | 0    | 25   | 0.75                          | 0.23                              | 0.30     |
| Mixed dishes           | 35       | 117          | 0   | 243  | 0                    | 0    | 107  | 0.01                          | 0.02                              | 0.53     |
| Females                |          |              |     |      |                      |      |      |                               |                                   |          |
| Vegetables             | 64       | 199          | 107 | 278  | 201                  | 153  | 313  | 0.42                          | 0.63                              | 0.72     |
| Fruit                  | 64       | 155          | 77  | 230  | 161                  | 96   | 238  | 0.56                          | 0.78                              | 0.84     |
| Added fats             | 64       | 8            | 1   | 18   | 14                   | 8    | 23   | 0.00                          | 0.43                              | 0.51     |
| Fish                   | 64       | 0            | 0   | 7    | 0                    | 0    | 32   | 0.43                          | 0.54                              | 0.97     |
| Legumes                | 64       | 0            | 0   | 0    | 0                    | 0    | 0    | 0.87                          | 0.39                              | 0.71     |
| Meat                   | 64       | 59           | 26  | 82   | 66                   | 33   | 99   | 0.15                          | 0.62                              | 0.87     |
| Eggs                   | 64       | 17           | 0   | 33   | 16                   | 0    | 33   | 0.66                          | 0.55                              | 0.73     |
| Nuts                   | 64       | 7            | 0   | 17   | 6                    | 0    | 17   | 0.76                          | 0.69                              | 0.86     |
| Milk and milk products | 64       | 242          | 111 | 378  | 247                  | 132  | 400  | 0.74                          | 0.83                              | 0.87     |
| Cheese                 | 64       | 23           | 10  | 42   | 31                   | 12   | 48   | 0.30                          | 0.71                              | 0.82     |
| Bread                  | 64       | 104          | 82  | 129  | 113                  | 82   | 143  | 0.24                          | 0.59                              | 0.87     |
| Cereal products        | 64       | 33           | 0   | 83   | 50                   | 4    | 97   | 0.08                          | 0.37                              | 0.80     |
| Potatoes               | 64       | 28           | 13  | 58   | 49                   | 21   | 84   | 0.02                          | 0.42                              | 0.71     |
| Drinks                 | 64       | 1327         | 871 | 1750 | 1722                 | 1317 | 2078 | 0.00                          | 0.56                              | 0.57     |
| Sandwich spreads       | 64       | 9            | 1   | 22   | 10                   | 2    | 18   | 0.83                          | 0.69                              | 0.79     |
| Soups                  | 64       | 0            | 0   | 83   | 0                    | 0    | 83   | 0.58                          | 0.59                              | 0.89     |
| Snacks                 | 64       | 34           | 14  | 81   | 40                   | 17   | 81   | 0.68                          | 0.69                              | 0.83     |
| Sauces                 | 64       | 8            | 0   | 21   | 10                   | 1    | 28   | 0.28                          | 0.37                              | 0.49     |
| Mixed dishes           | 64       | 22           | 0   | 138  | 0                    | 0    | 0    | 0.00                          | 0.15                              | 0.11     |

\* Wilcoxon signed rank test (normal approximation) testing the differences between 3-day average intakes of MijnEetmeter and the 24hr dietary recalls.

**Table S3.** Mean intake and (standard deviation) of nutrients as assessed with three day Mijneetmeter and with three 24-h dietary recalls and their difference and correlation, in the Mijneetmeter Study ( $n = 100$ ).

| Nutrient                             | Eetmeter 24-h Dietary Recalls |       |      |      | Difference |                         |                             |        | Pearsons Correlation Coefficient |      |
|--------------------------------------|-------------------------------|-------|------|------|------------|-------------------------|-----------------------------|--------|----------------------------------|------|
|                                      | Mean                          | SD    | Mean | SD   | Mean       | 95% Confidence Interval | % (Compared to 24hr Recall) | 3-Days | 1 Day                            |      |
| Vegetable protein (g)                | 32.8                          | 11.4  | 34.7 | 12.4 | -1.9       | -3.6                    | -0.3                        | -6     | 0.75                             | 0.76 |
| Fibre (g)                            | 24.2                          | 10.3  | 24.5 | 8.8  | -0.3       | -1.5                    | 0.9                         | -1     | 0.81                             | 0.76 |
| Alcohol (g)                          | 6                             | 11    | 6    | 11   | 0          | -1                      | 1                           | 2      | 0.79                             | 0.79 |
| Water (g)                            | 2214                          | 745   | 2644 | 720  | -430       | -542                    | -318                        | -16    | 0.70                             | 0.67 |
| Vitamin A (ug)                       | 888                           | 1,890 | 692  | 355  | 196        | -189                    | 581                         | 28     | 0.41*                            | 0.59 |
| Vitamin D (ug)                       | 2.4                           | 1.5   | 2.8  | 1.8  | -0.4       | -0.7                    | 0.0                         | -14    | 0.42                             | 0.59 |
| Vitamin E (mg)                       | 10.9                          | 4.3   | 12.2 | 4.7  | -1.3       | -2.2                    | -0.5                        | -11    | 0.51                             | 0.54 |
| Vitamin B1(mg)                       | 0.93                          | 0.33  | 1.01 | 0.34 | -0.08      | -0.13                   | -0.02                       | -7     | 0.63                             | 0.52 |
| Vitamin B2(mg)                       | 3.70                          | 23.35 | 1.42 | 0.59 | 2.27       | -2.36                   | 6.90                        | 160    | 0.69*                            | 0.66 |
| Vitamin B6 (mg)                      | 1.37                          | 0.49  | 1.50 | 0.44 | -0.13      | -0.20                   | -0.05                       | -8     | 0.68                             | 0.64 |
| Folate (folic acid equivalents) (ug) | 258                           | 101   | 274  | 94   | -16        | -31                     | 0                           | -6     | 0.68                             | 0.70 |
| Vitamin B12 (ug)                     | 3.98                          | 3.01  | 4.13 | 3.15 | -0.16      | -0.83                   | 0.52                        | -4     | 0.40                             | 0.52 |
| Vitamin B3 (mg)                      | 15.7                          | 6.7   | 16.5 | 6.0  | -0.8       | -2.0                    | 0.4                         | -5     | 0.54                             | 0.60 |
| Vitamin C (mg)                       | 97                            | 68    | 96   | 52   | 1          | -9                      | 10                          | 1      | 0.71                             | 0.79 |
| Potassium (mg)                       | 3137                          | 1044  | 3297 | 951  | -159       | -277                    | -42                         | -5     | 0.83                             | 0.73 |
| Calcium (mg)                         | 904                           | 324   | 992  | 373  | -88        | -140                    | -37                         | -9     | 0.73                             | 0.70 |
| Magnesium (mg)                       | 336                           | 119   | 365  | 123  | -30        | -45                     | -14                         | -8     | 0.79                             | 0.79 |
| Iron (mg)                            | 10.9                          | 3.5   | 11.1 | 3.4  | -0.2       | -0.9                    | 0.5                         | -2     | 0.49                             | 0.34 |
| Selenium (ug)                        | 49                            | 26    | 49   | 24   | 0          | -5                      | 6                           | 0      | 0.39                             | 0.81 |
| Zinc (mg)                            | 9.5                           | 3.0   | 9.8  | 2.8  | -0.3       | -0.8                    | 0.1                         | -3     | 0.67                             | 0.70 |
| Iodine (ug)                          | 184                           | 145   | 189  | 232  | -5         | -29                     | 19                          | -3     | 0.90                             | 0.93 |
| Phosphorus (mg)                      | 1311                          | 405   | 1428 | 421  | -117       | -170                    | -64                         | -8     | 0.79                             | 0.70 |

\* correlation coefficients are Spearman correlations because of extreme values in Mijneetmeter data

**Table S4.** Mean energy intake in kcal/day and (standard deviation) as assessed with three day Mijneetmeter and with three 24-h dietary recalls and their difference, for subgroups in the Mijneetmeter Study ( $n = 100$ ).

| Subgroup                                         | n  | Mijneetmeter 24hr Dietary Recalls |     | Difference |     |              |
|--------------------------------------------------|----|-----------------------------------|-----|------------|-----|--------------|
|                                                  |    | Mean                              | SD  | Mean       | SD  | Mean 95% CI  |
| Gender                                           |    |                                   |     |            |     |              |
| Men                                              | 35 | 2165                              | 504 | 2183       | 504 | -163 -293-33 |
| Women                                            | 64 | 1658                              | 364 | 1642       | 364 | -81 -159 -3  |
| Following a special diet                         |    |                                   |     |            |     |              |
| Yes                                              | 24 | 1615                              | 444 | 1533       | 444 | -58 -163 47  |
| No                                               | 76 | 1898                              | 480 | 1872       | 480 | -131 -214-49 |
| Weight loss of 3 kg or more in the last 6 months |    |                                   |     |            |     |              |
| Yes                                              | 29 | 1796                              | 471 | 1796       | 471 | -19 -155 116 |
| No                                               | 51 | 1939                              | 497 | 1961       | 497 | -131 -222-39 |
